# Supplementary material for: Three peroxomorphic H2O2 adducts of antibiotic furacin: the first cases of 2D hydrogen-bonded peroxide layers and concerted flip-flop hydrogen disorder of peroxide species
Source: Royal Society of Chemistry journal article supplement (doi:10.1039/d4ce00822g), 2024-01-01

**Three peroxomorphous H<sub>2</sub>O<sub>2</sub> adducts of antibiotic furacin: the first cases of 2D hydrogen-bonded peroxide layers and concerted flip-flop hydrogen disorder of peroxide species.**

*Andrei V. Churakov*

*N.S.Kurnakov Institute of General and Inorganic Chemistry, Russian Academy of Sciences, Leninskii prosp. 31, 119991 Moscow, Russia.*

1. **Tables S1-S3.** Geometric parameters of hydrogen bonds for structures **1-3**.
2. **Compounds and Solvents.**
3. **Table S4.** Crystal data and details of X-ray analysis for **1-3**.
4. **Optical microscopy.**
5. **Figure S1.** Hydrogen bonded 2D layers in the structure **1**.
6. **Figure S2.** Hydrogen bonds (dashed lines) formed by H7-O7-O7A-H7A molecule in the structure **2**.
7. **Figure S3.** Hydrogen bonds (dashed lines) formed by H1-O1-O2-H2 molecule in the structure **2**.
8. **Figure S4.** Hydrogen bonded 3D packing motif in the structure **2**.
9. **Figure S5.** Hydrogen bonds (dashed lines) formed by H1-O1-O2-H2 molecule in **3**.
10. **Figure S6.** Hydrogen bonds (dashed lines) formed by H3-O3-O4-H4 molecule in **3**.
11. **Figure S7.** Hydrogen bonds (dashed lines) formed by H5-O5-O6-H6 molecule in **3**.
12. **Figure S8.** Hydrogen bonds (dashed lines) formed by H7-O7-O8-H8 molecule in **3**.
13. **Figure S9.** Hydrogen bonds (dashed lines) formed by H9-O9-O10-H10 molecule **3**.
14. **Figure S10.** Hydrogen bonds (dashed lines) formed by H11-O11-O12-H12 molecule in **3**.
15. **Figure S11.** Hydrogen bonds (dashed lines) formed by H21-O21-O22-H22 molecule in **3**.

**Table S1.** Geometric parameters of hydrogen bonds in the structure **1**.

| D–H...A                  | D–H, Å    | H...A, Å  | D...A, Å   | ∠ D–H...A, ° |
|--------------------------|-----------|-----------|------------|--------------|
| O1–H1...O4               | 0.849(19) | 2.449(19) | 3.2261(12) | 152.5(16)    |
| O1–H1...O5               | 0.849(19) | 2.334(19) | 3.0429(13) | 141.3(16)    |
| O2–H2...O3 <sup>1</sup>  | 0.881(19) | 1.791(19) | 2.6603(13) | 168.8(16)    |
| N1–H11...O1              | 0.863(18) | 2.404(18) | 3.2246(14) | 159.1(15)    |
| N1–H12...O6 <sup>2</sup> | 0.856(17) | 2.477(17) | 3.2171(13) | 145.2(14)    |
| N2–H21...O5 <sup>3</sup> | 0.833(17) | 2.433(17) | 3.0798(13) | 135.1(14)    |

<sup>1</sup> x, y-1, z; <sup>2</sup> x-1/2, -y+1/2, z+1/2; <sup>3</sup> x, y+1, z

**Table S2.** Geometric parameters of hydrogen bonds in the structure **2**.

| D–H...A                  | D–H, Å    | H...A, Å  | D...A, Å   | ∠ D–H...A, ° |
|--------------------------|-----------|-----------|------------|--------------|
| O1–H1...O3 <sup>1</sup>  | 0.876(18) | 1.878(18) | 2.7390(11) | 167.1(16)    |
| O2–H2...O3               | 0.899(18) | 1.794(18) | 2.6893(11) | 173.2(17)    |
| O7–H7...O5               | 0.837(19) | 2.23(2)   | 2.9968(12) | 152.8(17)    |
| O7–H7...O4               | 0.837(19) | 2.238(19) | 2.9043(11) | 136.6(17)    |
| N1–H11...O7              | 0.839(16) | 2.324(16) | 3.1188(13) | 158.1(14)    |
| N1–H12...O1              | 0.876(16) | 2.282(16) | 3.0927(13) | 153.9(14)    |
| N2–H21...O2 <sup>2</sup> | 0.879(16) | 2.028(16) | 2.8681(11) | 159.7(14)    |

<sup>1</sup> -x+3/2, y+1/2, -z+1/2; <sup>2</sup> -x+3/2, y-1/2, -z+1/2

**Table S3.** Geometric parameters of hydrogen bonds in the structure **3**.

| D–H...A                    | D–H, Å    | H...A, Å  | D...A, Å   | ∠ D–H...A, ° |
|----------------------------|-----------|-----------|------------|--------------|
| O1–H1...O13                | 0.87(2)   | 1.82(2)   | 2.6958(15) | 180(2)       |
| O2–H2A...O8                | 0.92(4)   | 1.82(4)   | 2.7379(17) | 173(4)       |
| O2–H2B...O3 <sup>1</sup>   | 0.91(5)   | 2.17(5)   | 3.0409(19) | 159(4)       |
| O3–H3...O23 <sup>1</sup>   | 0.89(2)   | 1.81(2)   | 2.6967(16) | 175(2)       |
| O4–H4...O1                 | 0.84(3)   | 2.03(3)   | 2.8582(17) | 166(2)       |
| O5–H5...O22A               | 0.95(2)   | 1.87(2)   | 2.8125(17) | 171(2)       |
| O6–H6A...O6 <sup>1</sup>   | 0.92(7)   | 1.86(6)   | 2.728(3)   | 155(7)       |
| O6–H6B...O8 <sup>2</sup>   | 0.85      | 1.89      | 2.7371(19) | 179.9        |
| O7–H7...O4 <sup>2</sup>    | 0.847(10) | 2.121(13) | 2.906(2)   | 154(2)       |
| O8–H8B...O2                | 0.853(10) | 1.910(16) | 2.7379(17) | 163(4)       |
| O8–H8A...O6 <sup>2</sup>   | 0.853(10) | 1.916(18) | 2.7371(19) | 161(4)       |
| O9–H9...O12                | 0.877(10) | 1.935(10) | 2.8112(17) | 178(2)       |
| O10–H10...O7               | 0.853(9)  | 2.078(10) | 2.9272(19) | 173(2)       |
| O11–H11...O14              | 0.85(2)   | 2.29(2)   | 3.0766(15) | 153.2(19)    |
| O11–H11...O15              | 0.85(2)   | 2.30(2)   | 2.9728(16) | 136.7(18)    |
| O12–H12...O23 <sup>3</sup> | 0.86(2)   | 1.85(2)   | 2.6755(15) | 160(2)       |
| O21A–H21...O24             | 0.906(16) | 2.262(18) | 3.0696(15) | 148.3(17)    |
| O21A–H21...O25             | 0.906(16) | 2.33(2)   | 2.9866(16) | 129.0(17)    |
| O21B–H21...O24             | 0.926(16) | 2.262(18) | 3.079(14)  | 147(2)       |
| O21B–H21...O25             | 0.926(16) | 2.33(2)   | 3.014(15)  | 130(2)       |
| O22A–H22...O13             | 0.914(16) | 1.90(2)   | 2.7098(15) | 146.7(18)    |
| O22B–H22...O13             | 0.933(16) | 1.90(2)   | 2.605(15)  | 130.7(17)    |
| N11–H16...O11              | 0.82(2)   | 2.33(2)   | 3.1181(18) | 163.5(18)    |
| N11–H17...O2               | 0.79(2)   | 2.45(2)   | 3.1696(19) | 153.7(18)    |
| N12–H18...O25              | 0.85(2)   | 2.12(2)   | 2.9562(16) | 169.2(19)    |
| C12–H13...O26              | 0.950(18) | 2.441(18) | 3.3795(18) | 169.7(15)    |
| N21–H26...O21A             | 0.833(19) | 2.408(19) | 3.2155(18) | 163.6(16)    |
| N21–H26...O21B             | 0.833(19) | 2.38(2)   | 3.188(16)  | 162.8(17)    |
| N21–H27...O4               | 0.80(2)   | 2.34(2)   | 3.0779(18) | 154.3(18)    |
| N22–H28...O15 <sup>4</sup> | 0.82(2)   | 2.19(2)   | 2.9938(16) | 166.4(19)    |
| C22–H23...O16 <sup>4</sup> | 0.934(18) | 2.494(18) | 3.4270(18) | 176.8(15)    |

<sup>1</sup> -x, -y+1, -z; <sup>2</sup> -x+1, -y+1, -z; <sup>3</sup> x+1, y-1, z; <sup>4</sup> x-1, y+1, z

**Compounds and Solvents.** Furacin was obtained by vacuum evaporation of 1:1500 pharmaceutical solution in 70% ethanol (Yaroslavl pharmaceutical factory, Russia).

60 wt% hydrogen peroxide was purchased from Fisher Scientific (Loughborough, UK). 96 wt% hydrogen peroxide was prepared by an evaporation method.<sup>[S1]</sup> Handling procedures for concentrated hydrogen peroxide are described in detail (danger of explosion!).<sup>[S2,S3]</sup>

When dissolving organic compounds in concentrated hydrogen peroxide, the following safety precautions must be observed:

- 1) The volume of hydrogen peroxide should not exceed 0.5 ml;
- 2) The temperature of solutions should not rise above 40° C, since with a further increase in temperature, self-accelerating oxidation processes may begin;
- 3) Only vials with PTFE septa and screw caps with holes should be used to prevent pressure build-up;
- 4) It is not recommended to tightly wrap the caps of the vials during long-term storage.

Yellow-orange crystals of **1**, **2**, and **3** were obtained by cooling to -21°C (for **1**) or -35°C (for **2** and **3**) saturated solutions (rt) of furacin in 96%, 50%, and 20% hydrogen peroxide, respectively. These samples were prepared by dissolving approximately 10-15 mg of furacin in 0.25 ml of hydrogen peroxide solutions in 2 ml vials.

According to our rough estimates, the solubility of furacin in 96% H<sub>2</sub>O<sub>2</sub> is approximately an order of magnitude higher than in water or ethanol. Apparently, concentrated hydrogen peroxide is the best solvent for furacin among all known ones.

[S1] M. V. Vener, A. V. Churakov, A. P. Voronin, O. D. Parashchuk, S. V. Artobolevskii, O. A. Alatortsev, D. E. Makhrov, A. G. Medvedev, A. Filarowski, *Molecules* **2022**, *27*, 717(1-13).

[S2] W. C. Schumb, C. N. Satterfield, R. P. Wentworth, *Hydrogen peroxide*, Reinhold publishing corp., New York, **1955**.

[S3] O. Maass, W. H. Hatcher, *J. Am. Chem. Soc.* **1920**, *42*, 2548-2569.

**Table S4.** Crystal data and details of X-ray analysis.

|                                                             | <b>1</b>                                                    | <b>2</b>                                                    | <b>3</b>                                                       |
|-------------------------------------------------------------|-------------------------------------------------------------|-------------------------------------------------------------|----------------------------------------------------------------|
| Formula                                                     | C <sub>6</sub> H <sub>8</sub> N <sub>4</sub> O <sub>6</sub> | C <sub>6</sub> H <sub>9</sub> N <sub>4</sub> O <sub>7</sub> | C <sub>12</sub> H <sub>26</sub> N <sub>8</sub> O <sub>22</sub> |
| <i>F</i> <sub>w</sub>                                       | 232.16                                                      | 249.17                                                      | 634.41                                                         |
| colour, habit                                               | yellow, prism                                               | orange, prism                                               | orange, plate                                                  |
| cryst size (mm)                                             | 0.22×0.08×0.04                                              | 0.25×0.20×0.20                                              | 0.45×0.20×0.03                                                 |
| temperature (K)                                             | 100                                                         | 100                                                         | 100                                                            |
| crystal system                                              | monoclinic                                                  | monoclinic                                                  | triclinic                                                      |
| space group                                                 | <i>P</i> 2 <sub>1</sub> / <i>n</i>                          | <i>C</i> 2/ <i>c</i>                                        | <i>P</i> -1                                                    |
| <i>a</i> (Å)                                                | 7.3836(3)                                                   | 12.6420(4)                                                  | 8.8432(3)                                                      |
| <i>b</i> (Å)                                                | 8.3568(3)                                                   | 8.4671(3)                                                   | 12.7456(5)                                                     |
| <i>c</i> (Å)                                                | 15.1792(5)                                                  | 18.6298(6)                                                  | 13.2427(5)                                                     |
| <i>α</i> (deg)                                              | 90                                                          | 90                                                          | 105.6813(13)                                                   |
| <i>β</i> (deg)                                              | 98.580(1)                                                   | 101.447(1)                                                  | 108.5010(13)                                                   |
| <i>γ</i> (deg)                                              | 90                                                          | 90                                                          | 103.7032(14)                                                   |
| <i>V</i> (Å <sup>3</sup> )                                  | 926.12(6)                                                   | 1954.49(11)                                                 | 1274.85(8)                                                     |
| <i>Z</i>                                                    | 4                                                           | 8                                                           | 2                                                              |
| <i>D</i> <sub>c</sub> (g·cm <sup>-3</sup> )                 | 1.665                                                       | 1.694                                                       | 1.653                                                          |
| <i>μ</i> (mm <sup>-1</sup> )                                | 0.150                                                       | 0.156                                                       | 0.161                                                          |
| <i>F</i> (000)                                              | 480                                                         | 1032                                                        | 660                                                            |
| <i>θ</i> range (deg)                                        | 2.71 to 28.00                                               | 2.23 to 30.00                                               | 1.77 to 29.00                                                  |
| refl colld                                                  | 12635                                                       | 15596                                                       | 19704                                                          |
| indep reflns / <i>R</i> <sub>int</sub>                      | 2228 / 0.025                                                | 2855 / 0.026                                                | 6764 / 0.028                                                   |
| reflns <i>I</i> >2σ( <i>I</i> )                             | 1987                                                        | 2473                                                        | 5311                                                           |
| No of param                                                 | 178                                                         | 190                                                         | 495                                                            |
| GooF on <i>F</i> <sup>2</sup>                               | 1.029                                                       | 1.048                                                       | 1.027                                                          |
| <i>R</i> <sub>1</sub> ( <i>I</i> >2σ( <i>I</i> ))           | 0.0315                                                      | 0.0315                                                      | 0.0426                                                         |
| <i>wR</i> <sub>2</sub> (all data)                           | 0.0799                                                      | 0.0844                                                      | 0.1107                                                         |
| largest diff peak / hole (e <sup>-</sup> ·Å <sup>-3</sup> ) | 0.35 / -0.21                                                | 0.37 / -0.26                                                | 0.45 / -0.39                                                   |
| CCDC number                                                 | 2279089                                                     | 2279090                                                     | 2279091                                                        |

### X-ray crystallography

The samples were withdrawn from the crystallization vials using corrosion-resistant steel spatula and immediately placed inside a drop of perfluorinated Fomblin YR-1800 oil on the microscope slides. The appropriate single crystals were mounted on the top of Mitegen MicroLoops and transferred instantly to a cold nitrogen stream on the diffractometer.

Experimental data sets were collected on a Bruker D8 Venture diffractometer using graphite monochromatized Mo-*Kα* radiation ( $\lambda = 0.71073$  Å). Absorption corrections based on measurements of equivalent reflections were applied.<sup>[S4]</sup> The structures were solved by direct methods and refined by full matrix least-squares on *F*<sup>2</sup> with anisotropic thermal parameters for all non-hydrogen atoms.<sup>[S5]</sup> In all cases, partial substitutional disorder of hydrogen peroxide by water molecules<sup>[S6-S9]</sup> was not observed since no residual peaks with an intensity more than 0.3 e<sup>-</sup>·Å<sup>-3</sup> were seen in the hydrogen peroxide molecule regions. All hydrogen atoms were found from difference Fourier synthesis and refined with isotropic thermal parameters (except for peroxide molecules in **3**). In the structure **3**, atoms H2, H6 and H8 were found to be equally disordered over two positions; all peroxide H atoms were refined with restrained O-H distances. Details of X-ray studies are listed in Table S4. The single-crystal X-ray

diffraction studies were performed at the Centre of Shared Equipment of IGIC RAS. Crystallographic data deposited with Cambridge Structural Database (see Table S4).

[S4] L. Krause, R. Herbst-Irmer, G. M. Sheldrick, D. Stalke, *J. Appl. Cryst.* **2015**, *48*, 3-10.

[S5] G. M. Sheldrick, *Acta Crystallogr., Sect. C: Struct. Chem.* **2015**, *71*, 3-8.

[S6] A. V. Churakov, P. V. Prikhodchenko, J. A. K. Howard, *CrystEngComm* **2005**, *7*, 664-669.

[S7] B. F. Pedersen, *Acta Crystallogr., Sect. B: Struct. Crystallogr. Cryst. Chem.* **1972**, *28*, 746-754.

[S8] B. F. Pedersen, *Acta Crystallogr., Sect. B: Struct. Crystallogr. Cryst. Chem.* **1972**, *28*, 1014-1016.

[S9] G. Laus, V. Kahlenberg, K. Wurst, T. Lörting, H. Schottenberger, *CrystEngComm* **2008**, *10*, 1638-1644.

**Optical microscopy.** Photos of crystalline 1 were taken on Olympus SZ-61TR stereomicroscope equipped with CAM-LC30 camera at 50x magnification. Thermographic movie was recorded on Olympus BX43 microscope equipped with QIClick 1394 video camera and Linkam DSC600 heating stage in temperature range 30-120° C at heating rate 10 deg/sec.

**Figure S1.** Hydrogen bonded 2D layers parallel to the (101) plane of the lattice in the structure **1**.

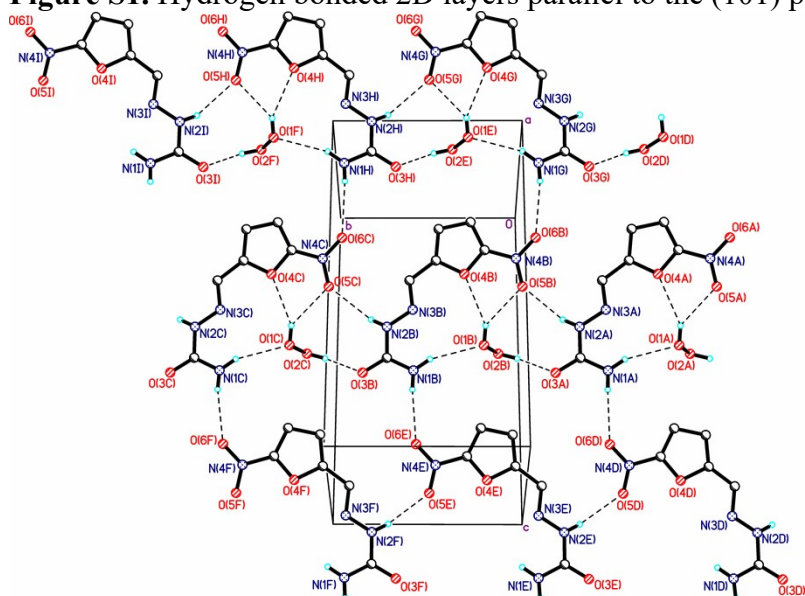

**Figure S2.** The [2,2] hydrogen bonding mode for H7-O7-O7A-H7A molecule in the structure **2**.

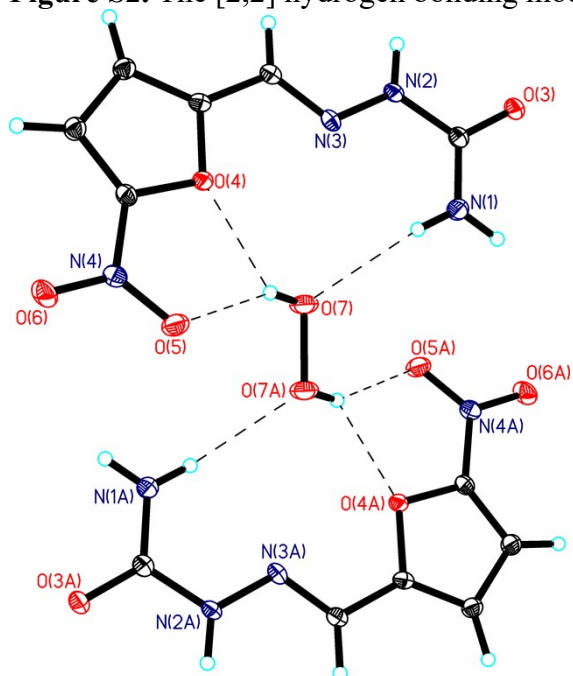

**Figure S3.** The [2,2] hydrogen bonding mode H1-O1-O2-H2 molecule in the structure **2**.

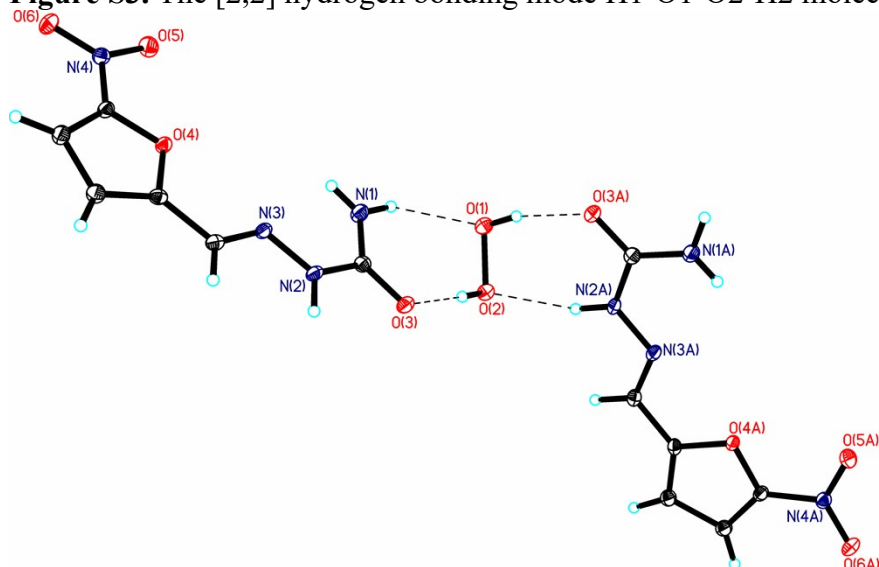

**Figure S4.** Hydrogen bonded 3D packing motif in the structure **2**.

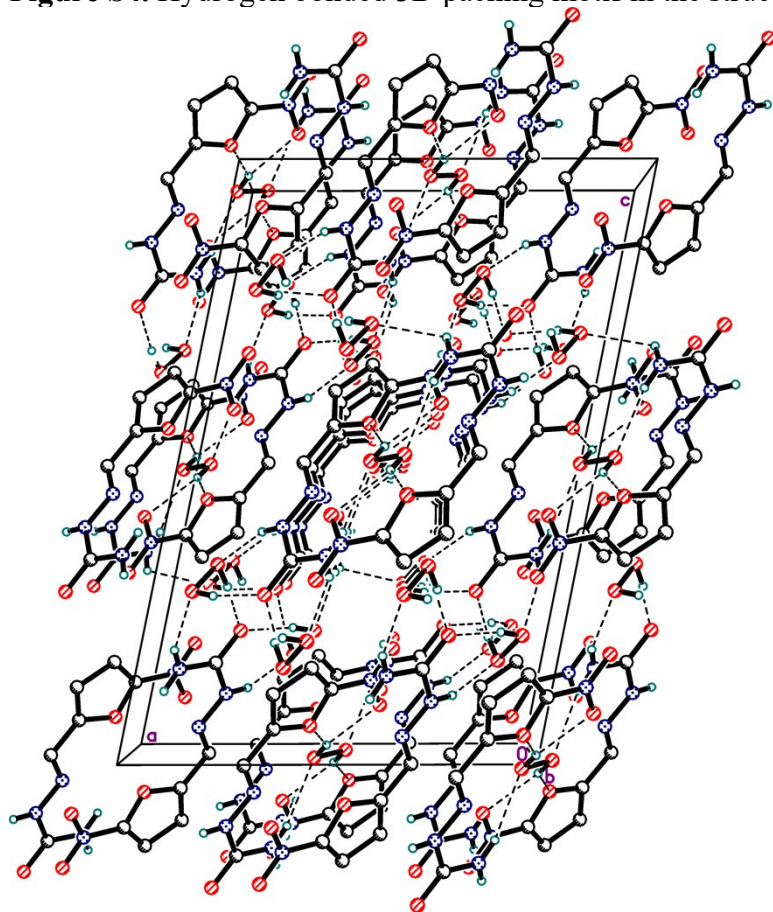

**Figure S5.** Hydrogen bonds (dashed lines) formed by H1-O1-O2-H2 molecule in **3**.

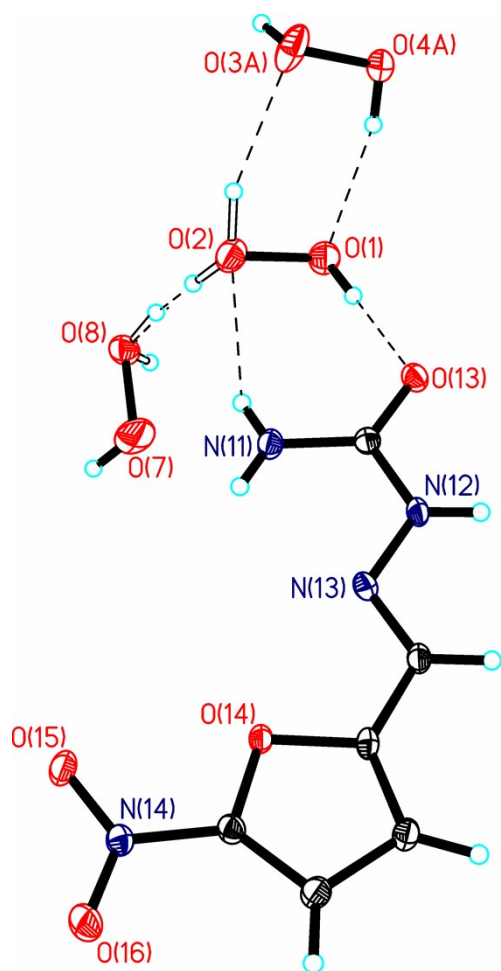



**Figure S6.** Hydrogen bonds (dashed lines) formed by H3-O3-O4-H4 molecule in **3**.

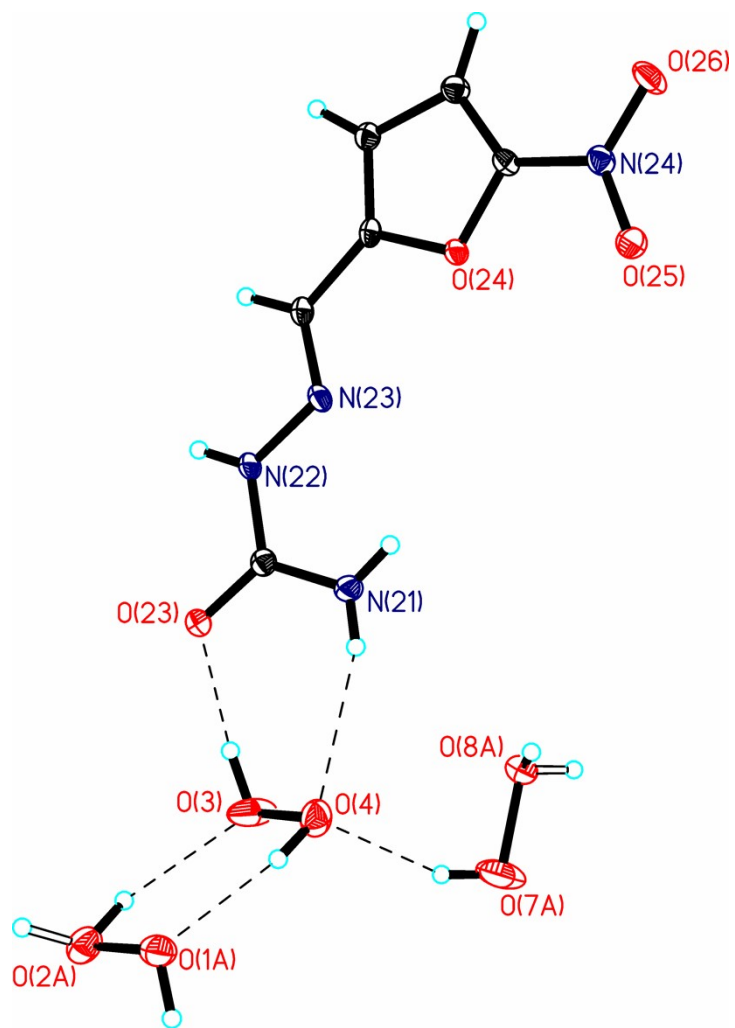

**Figure S7.** Hydrogen bonds (dashed lines) formed by H5-O5-O6-H6 molecule in **3**.

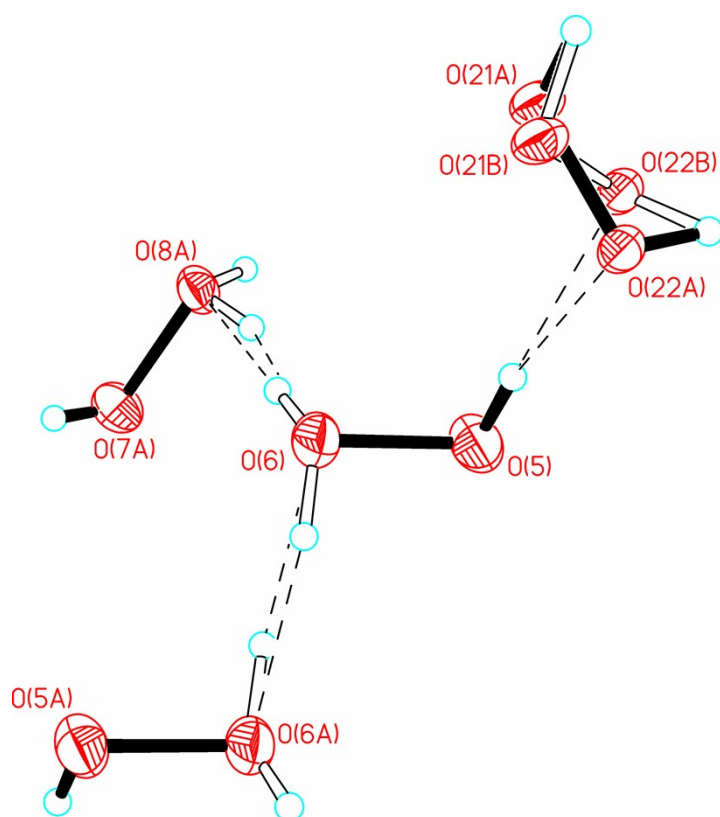

**Figure S8.** Hydrogen bonds (dashed lines) formed by H7-O7-O8-H8 molecule in **3**.

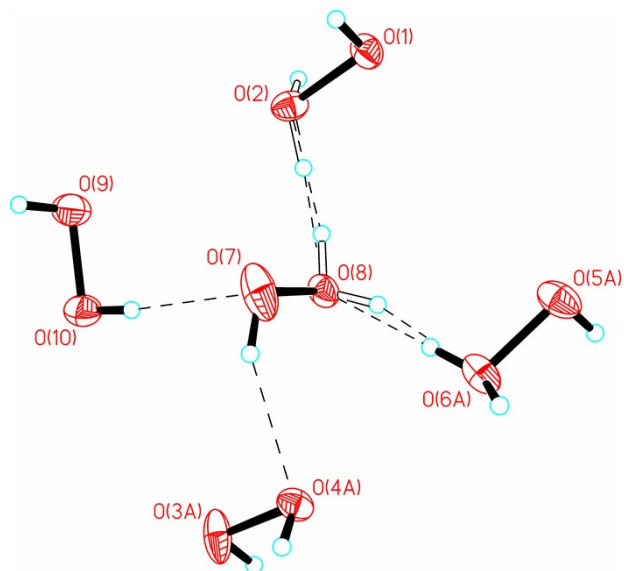

**Figure S9.** Hydrogen bonds (dashed lines) formed by H9-O9-O10-H10 molecule **3**.

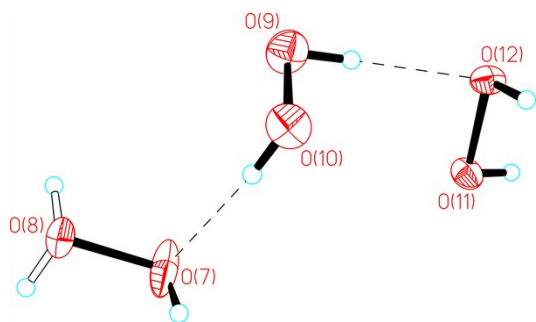

**Figure S10.** Hydrogen bonds (dashed lines) formed by H11-O11-O12-H12 molecule in **3**.

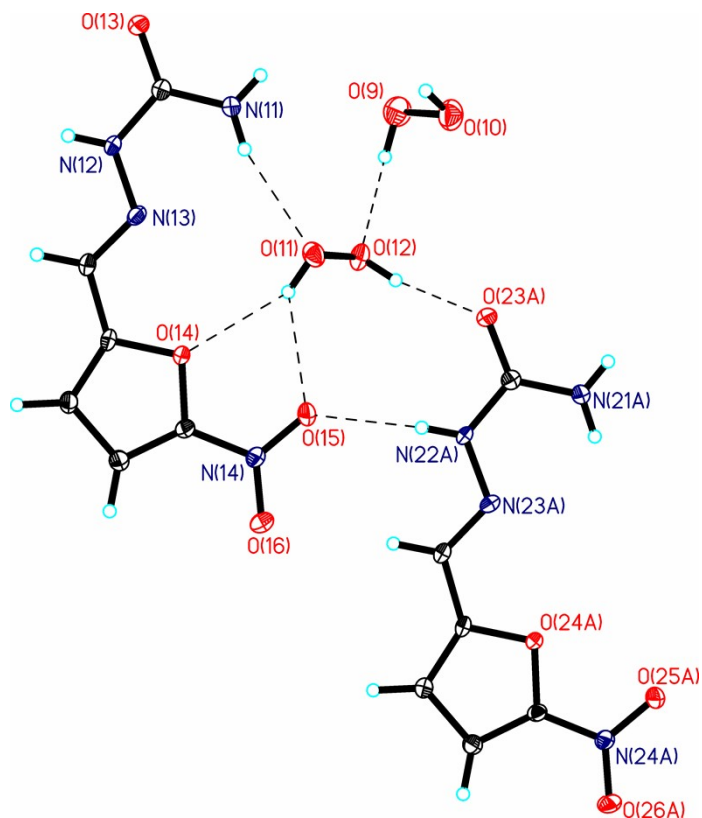

**Figure S11.** Hydrogen bonds (dashed lines) formed by H21-O21-O22-H22 molecule in **3**.

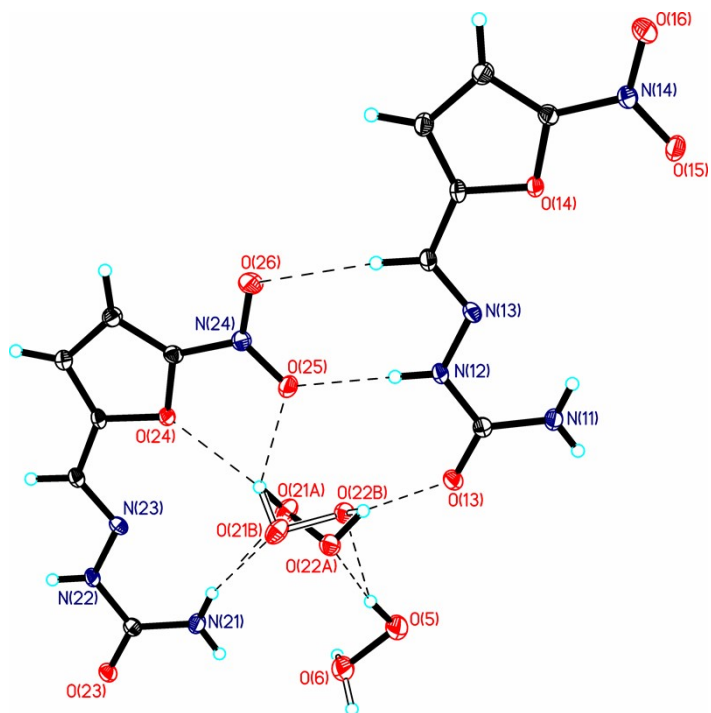

Supplement: d4ce00822g1.pdf [file d4ce00822g1.pdf]
